# Supplementary material
Source: PubMed Central journal article supplement (PMC3220523)
Supplement: supp_M111.262246_jbc.M111.262246-1.pdf [file supp_M111.262246_jbc.M111.262246-1.pdf]

## THE P21-ACTIVATED KINASE 3 (PAK3) REGULATES SYNAPTIC TRANSMISSION THROUGH ITS INTERACTION WITH THE NCK2/GRB4 ADAPTOR

Thevenot et al.

### Supplementary data

SD 1, CaMKII phosphorylation of the PAKs N-ter parts. PAK1-(2-56), PAK2-(2-52), and PAK3-(2-49) GST-fused proteins were purified (Coomassie Blue staining, upper), and tested on CaMKII kinase assay (lower). The high molecular weight phosphoprotein corresponds to autophosphorylated CaMKII. Since we identified CaMKII as a potential kinase for the serine 20 of PAK3, we compared the kinase efficiency of CaMKII to phosphorylate the N-ter part of the three PAK homologous. GST or GST-fused to the N-ter part of PAKs, corresponding to the mouse (2-56) N-ter part of PAK1, to the rat (2-52) N-ter part of PAK2, and to mouse (2-49) N-ter part of PAK3 were purified were tested in a kinase assay with a catalytically active recombinant CaMKII. The amino-terminal portion of mouse PAK3 was highly phosphorylated by CaMKII whereas the GST portion alone, or fused with homologous parts of PAK1 or PAK2 were not.

SD 2, sequence of the amino part of the different mutants used in the figure 4D. The serine 20 residue is a potential regulatory site whose homologous residue in PAK1 is autophosphorylated and phosphorylated by Akt. This residue is crucial for Nck binding and in PAK1 its phosphorylation and its mutation totally inhibit Nck binding. In primates, the serine 4 residue found in rodents and other vertebrates is replaced by a glycine residue.

SD 3, two-hybrid analysis of PAK3-Nck1 interaction. *A*, schematic representation of PAK3 and Nck1 proteins expressed in yeast. The LexA binding domain was fused to the NH2 extremity of the full length PAK3 protein and the GAD domain was fused to the full length Nck1 protein. The P12A and S20E mutations in the first proline rich domain of PAK3 and the W143K mutation in the second SH3 domain of Nck1 are indicated. *B*, the interaction between PAK3 and Nck1 involves the first proline-rich domain of PAK3 and the second SH3 domain of Nck1. The two mutations P12A and S20E in PAK3 and the W143K mutation in Nck1 abolish the two-hybrid complex. Growth of colonies on SD-L/W media Growth confirms double transfection of the 2 plasmids. This experiment was performed on three independent colonies and repeated three times.

SD 4, table of the interactions analyzed between PAK3 and the Nck adaptors. T: method used, PD: pull down, 2H: two hybrid assay, CIP: co-immunoprecipitation. R: result : +: interaction, -: no interaction.

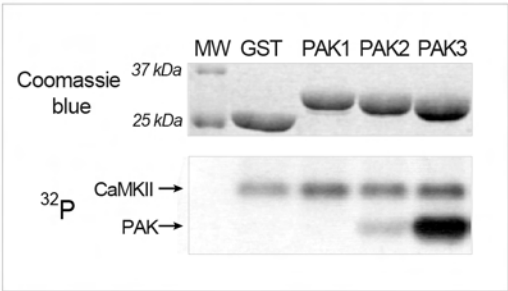

GST-PAK3-(2-49)-wt: GST-SDSLDNEEKPPAPPLRMNSNNRDSSALNHSSKPLPMAPEEKNKKARLR  
GST-PAK3-(2-49)-S20E: GST-SDSLDNEEKPPAPPLRMNE~~E~~NNRDSSALNHSSKPLPMAPEEKNKKARLR  
GST-PAK3-(2-49)-S4G: GST-SDG~~S~~LDNEEKPPAPPLRMNSNNRDSSALNHSSKPLPMAPEEKNKKARLR  
GST-PAK3-(2-49)-S4G/S20E: GST-SDG~~S~~LDNEEKPPAPPLRMNE~~E~~NNRDSSALNHSSKPLPMAPEEKNKKARLR

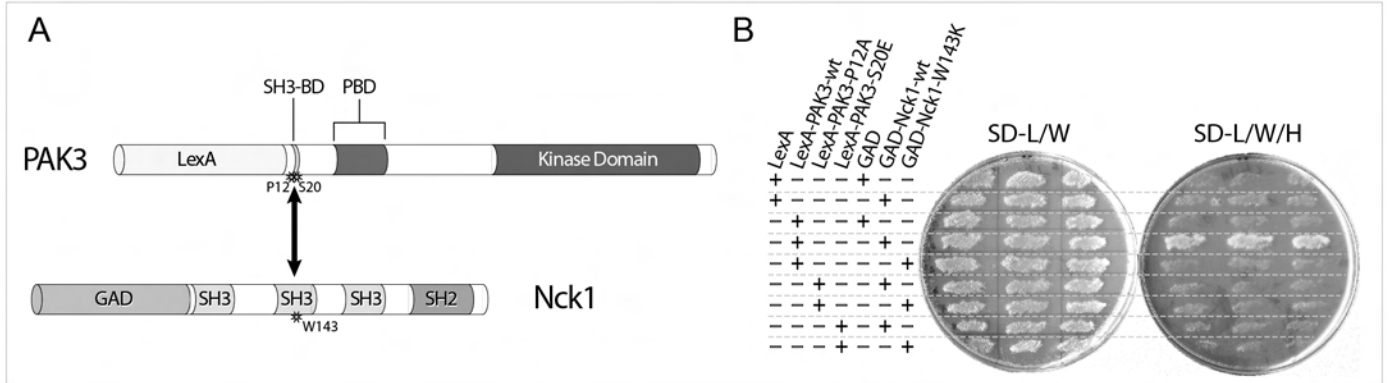

| Goal                                                     | Pak3                              | Nck                   | T   | R  | Figure    |
|----------------------------------------------------------|-----------------------------------|-----------------------|-----|----|-----------|
| Characterization of the PAK3/Nck interaction domains     | Flag-PAK3-FL-wt                   | HA-Nck1-FL-wt         | CIP | +  | 2A        |
|                                                          | Flag-PAK3-FL-wt                   | HA-Nck2-FL-wt         | CIP | +  | 2A        |
|                                                          | HA-PAK3-FL-wt                     | GST-Nck1-(SH3)2-wt    | PD  | +  | 3A        |
|                                                          | HA-PAK3-FL-wt                     | GST-Nck2-(SH3)2-wt    | PD  | +  | 3A        |
|                                                          | LexA-PAK3-FL-wt                   | GAD-Nck1-FL-wt        | 2H  | +  | SD3       |
|                                                          | GST-PAK3-(2-49)-wt                | Myc-Nck1-FL-wt        | PD  | +  | not shown |
|                                                          | LexA-PAK3-(2-270)-wt              | GAD-Nck1-(SH3)2-wt    | 2H  | +  | not shown |
|                                                          | PAK3-(2-270)-wt-LexA              | GAD-Nck1-(SH3)2-wt    | 2H  | +  | not shown |
|                                                          | GST-PAK3-(2-49)-wt                | Myc-NCK1-FL-W143K     | PD  | -  | not shown |
|                                                          | LexA-PAK3-FL-wt                   | GAD-Nck1-FL-W143K     | 2H  | -  | SD3       |
|                                                          | LexA-PAK3-(2-270)-wt              | GAD-Nck1-(SH3)2-W143K | 2H  | -  | not shown |
|                                                          | PAK3-(2-270)-wt-LexA              | GAD-Nck1-(SH3)2-W143K | 2H  | -  | not shown |
|                                                          | HA-PAK3-FL-wt                     | Myc-Nck1-FL-W143K     | CIP | +  | not shown |
| Mental retardation mutations                             | Flag-PAK3-FL-R67C                 | HA-Nck2FL-wt          | CIP | +  | 2D        |
|                                                          | Flag-PAK3-FL-A365E                | HA-Nck2-FL-wt         | CIP | +  | 2D        |
|                                                          | Flag-PAK3-FL-R419Stop             | HA-Nck2-FL-wt         | CIP | +  | 2D        |
| Role of the activity and activation in complex formation | Flag-PAK3-FL-ca                   | GST-Nck1-(SH3)2-wt    | PD  | +  | 3A        |
|                                                          | Flag-PAK3-FL-kd                   | GST-Nck1-(SH3)2-wt    | PD  | +  | 3A        |
|                                                          | Flag-PAK3-FL-ca                   | Myc-Nck1-FL-wt        | CIP | +  | not shown |
|                                                          | Flag-PAK3-FL-kd                   | Myc-Nck1-FL-wt        | CIP | +  | not shown |
|                                                          | Flag-PAK3-FL-wt + Cdc42-V12       | GST-Nck1-(SH3)2-wt    | PD  | +  | not shown |
|                                                          | Flag-PAK3-FL-ca + Cdc42-V12       | GST-Nck1-(SH3)2-wt    | PD  | +  | not shown |
|                                                          | Flag-PAK3-FL-kd + Cdc42-V12       | GST-Nck1-(SH3)2-wt    | PD  | +  | not shown |
|                                                          | Flag-PAK3-FL-wt + Cdc42-N17       | GST-Nck1-(SH3)2-wt    | PD  | +  | not shown |
|                                                          | Flag-PAK3-FL-ca + Cdc42-N17       | GST-Nck1-(SH3)2-wt    | PD  | +  | not shown |
|                                                          | Flag-PAK3-FL-kd + Cdc42-N17       | GST-Nck1-(SH3)2-wt    | PD  | +  | not shown |
|                                                          | Flag-PAK3-FL-wt + Cdc42-V12       | HA-Nck1-FL-wt         | CIP | +  | 3B        |
|                                                          | Flag-PAK3-FL-wt + Cdc42-N17       | HA-Nck1-FL-wt         | CIP | +  | 3B        |
|                                                          | Flag-PAK3-FL-kd + Cdc42-V12       | HA-Nck1-FL-wt         | CIP | +  | 3B        |
|                                                          | Flag-PAK3-FL-wt + Cdc42-V12       | HA-Nck2-FL-wt         | CIP | +  | 3C        |
|                                                          | Flag-PAK3-FL-wt + Cdc42-N17       | HA-Nck2-FL-wt         | CIP | +  | 3C        |
| Flag-PAK3-FL-kd + Cdc42-V12                              | HA-Nck2-FL-wt                     | CIP                   | +   | 3C |           |
| Characterization of the role of the Serine 20 residue    | HA-PAK3-FL-S20E                   | GST-Nck1-(SH3)2-wt    | PD  | -  | not shown |
|                                                          | HA-PAK3-FL-S20A                   | GST-Nck1-(SH3)2-wt    | PD  | -  | not shown |
|                                                          | GST-PAK3-(2-49)-S20E              | Myc-Nck1-FL-wt        | PD  | -  | not shown |
|                                                          | LexA-PAK3-FL-S20E                 | GAD-Nck1-FL-wt        | 2H  | -  | SD3       |
| Characterisation of the mimetic peptide P <sub>12</sub>  | Flag-PAK3-FL-wt + P <sub>12</sub> | HA-Nck1-FL-wt         | CIP | +  | 5C        |
|                                                          | Flag-PAK3-FL-wt + A <sub>12</sub> | HA-Nck1-FL-wt         | CIP | +  | 5C        |
|                                                          | Flag-PAK3-FL-wt + P <sub>12</sub> | HA-Nck2-FL-wt         | CIP | -  | 5C        |
|                                                          | Flag-PAK3-FL-wt + A <sub>12</sub> | HA-Nck2-FL-wt         | CIP | +  | 5C        |
| Characterization of the P12A mutation                    | HA-PAK3-FL-P12A                   | GST-Nck1-(SH3)2-wt    | PD  | -  | 6B        |
|                                                          | HA-PAK3-FL-WT                     | GST-Nck1-(SH3)2-wt    | PD  | +  | 6B        |
|                                                          | HA-PAK3-FL-P12A                   | GST-Nck2-(SH3)2-wt    | PD  | -  | 6B        |
|                                                          | HA-PAK3-FL-wt                     | GST-Nck2-(SH3)2-wt    | PD  | +  | 6B        |
|                                                          | Flag-PAK3-FL-P12A                 | HA-Nck1-FL-wt         | CIP | +  | 6C        |
|                                                          | Flag-PAK3-FL-Δnter                | HA-Nck1-FL-wt         | CIP | +  | 6C        |
|                                                          | Flag-PAK3-FL-P12A                 | HA-Nck2-FL-wt         | CIP | -  | 6E        |
|                                                          | Flag-PAK3-FL-Δnter                | HA-Nck2-FL-wt         | CIP | -  | 6E        |
|                                                          | PAK3-(2-270)-FL-P12A-LexA         | GAD-Nck1-(SH3)2-wt    | 2H  | -  | not shown |
|                                                          | LexA-PAK3-P12A                    | GAD-Nck1-FL-wt        | 2H  | -  | SD3       |
